# Supplementary material for: The Effects of a Curcumin Derivative and Osimertinib on Fatty Acyl Metabolism and Mitochondrial Functions in HCC827 Cells and Tumors
Source: MDPI journal article supplement (doi:10.3390/ijms241512190), 2023-07-29
Supplement: s1 [file s1]

A

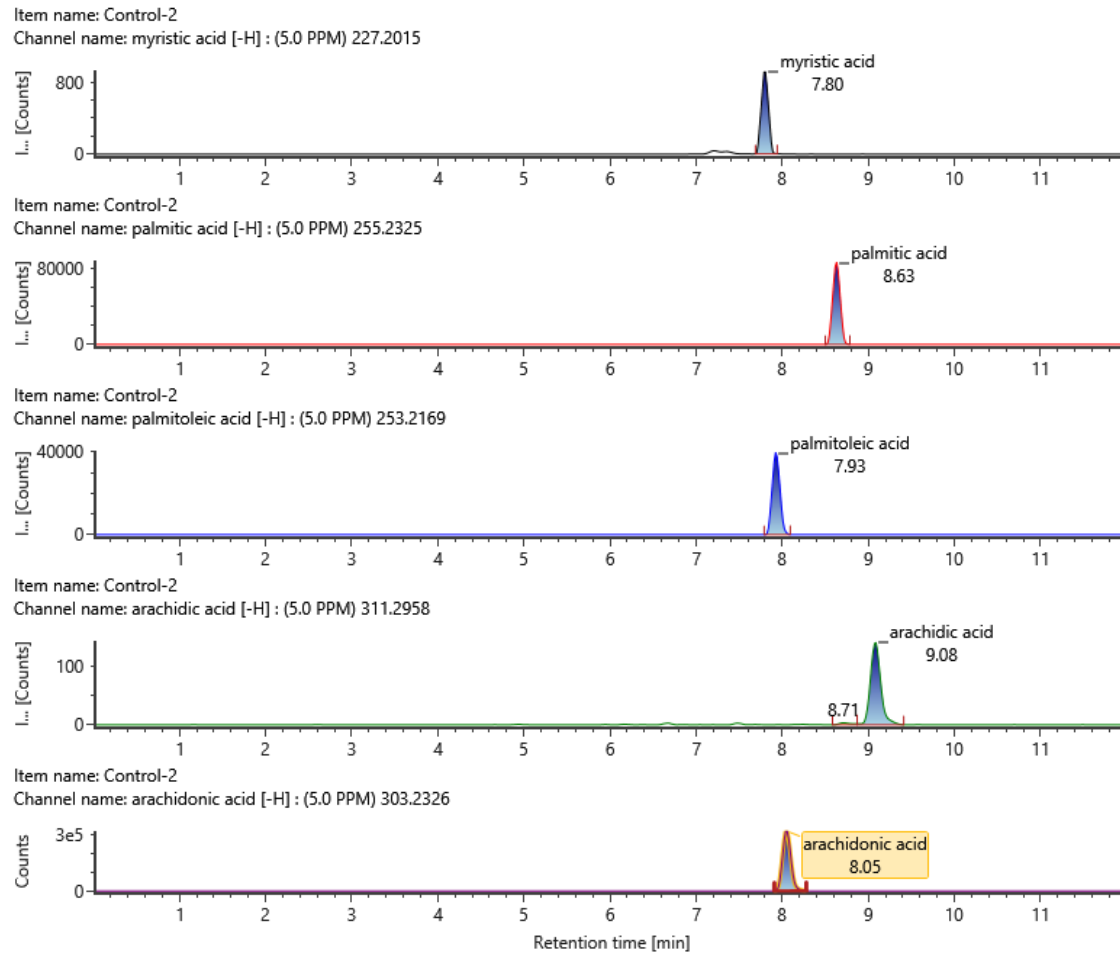

B

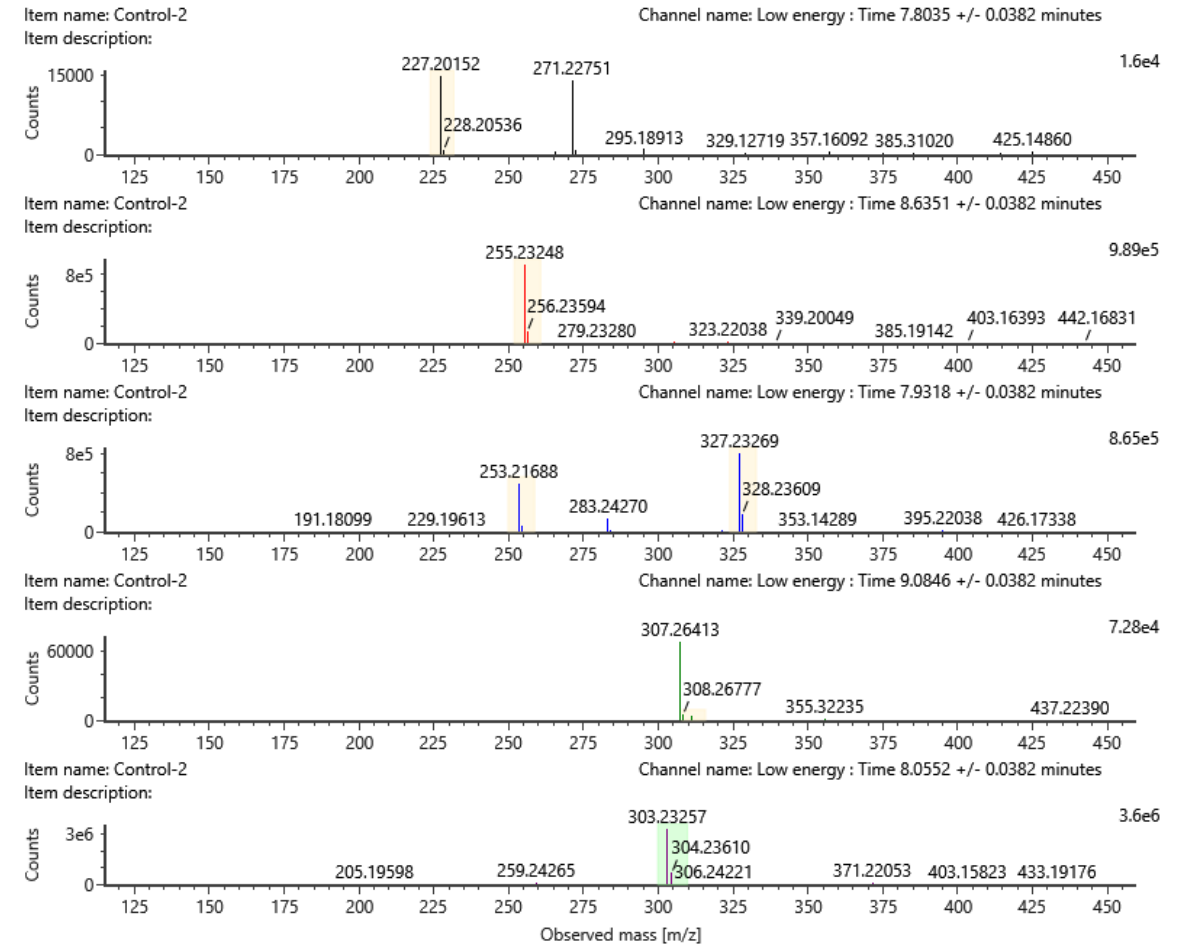

Figure S1. Representative (A) chromatogram and (B) mass spectrum for Figure 2.

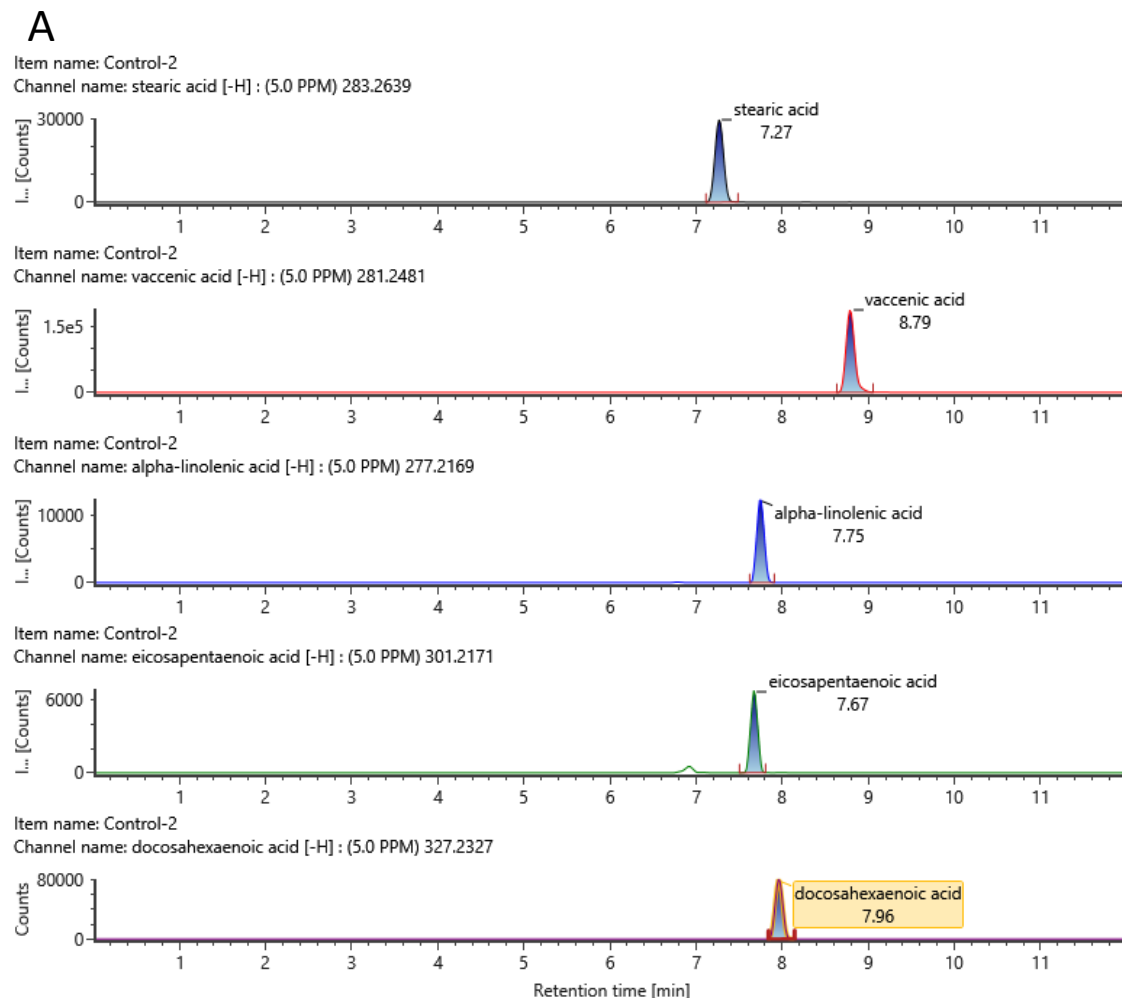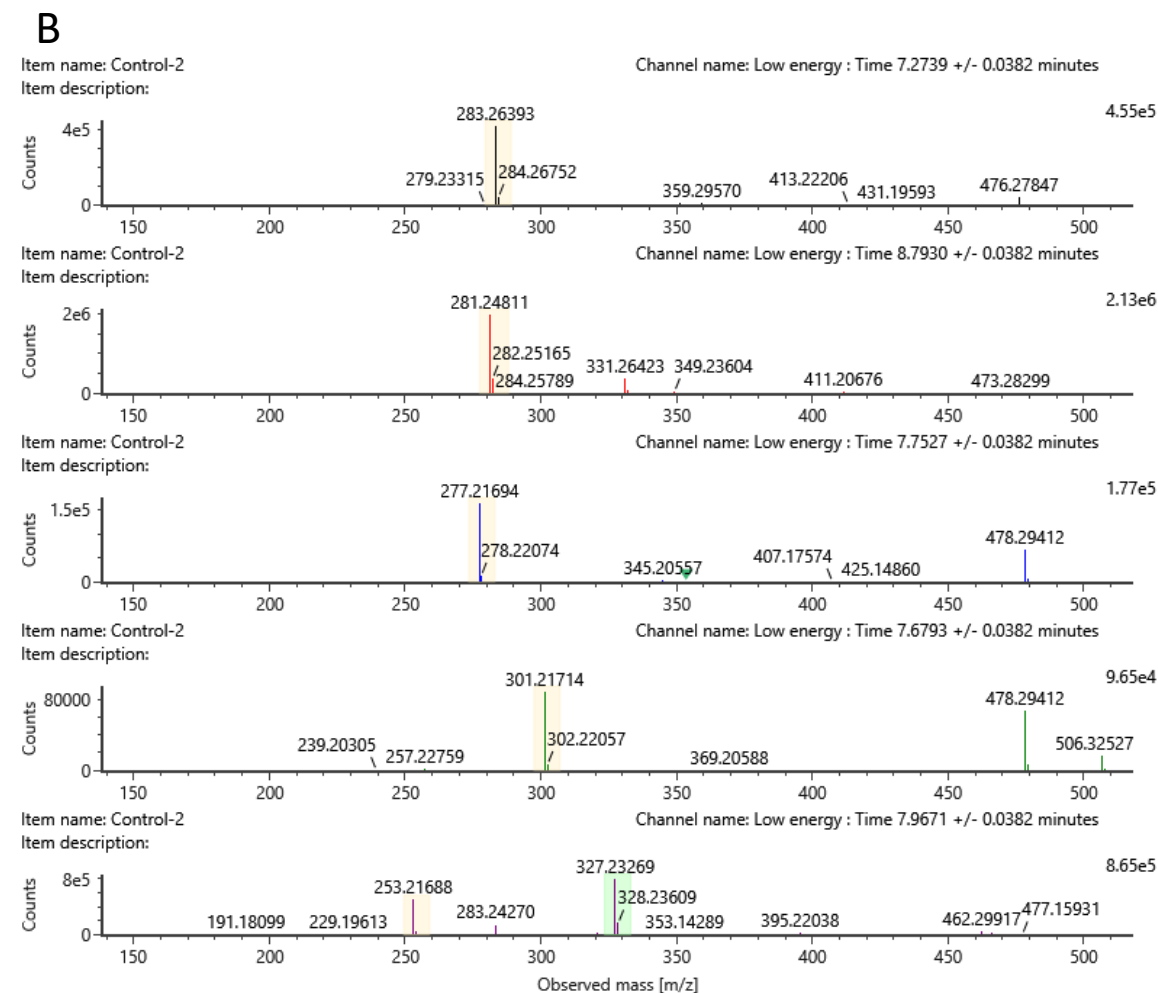

Figure S1. Representative (A) chromatogram and (B) mass spectrum for Figure 2 (continued).

A

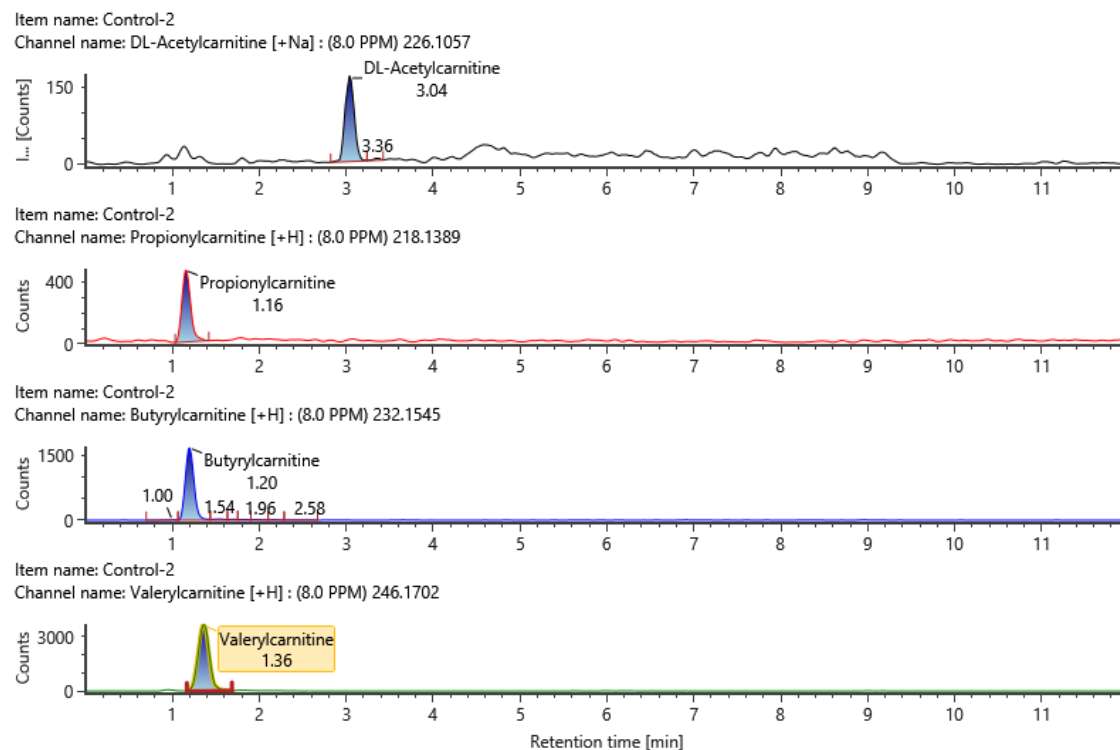

B

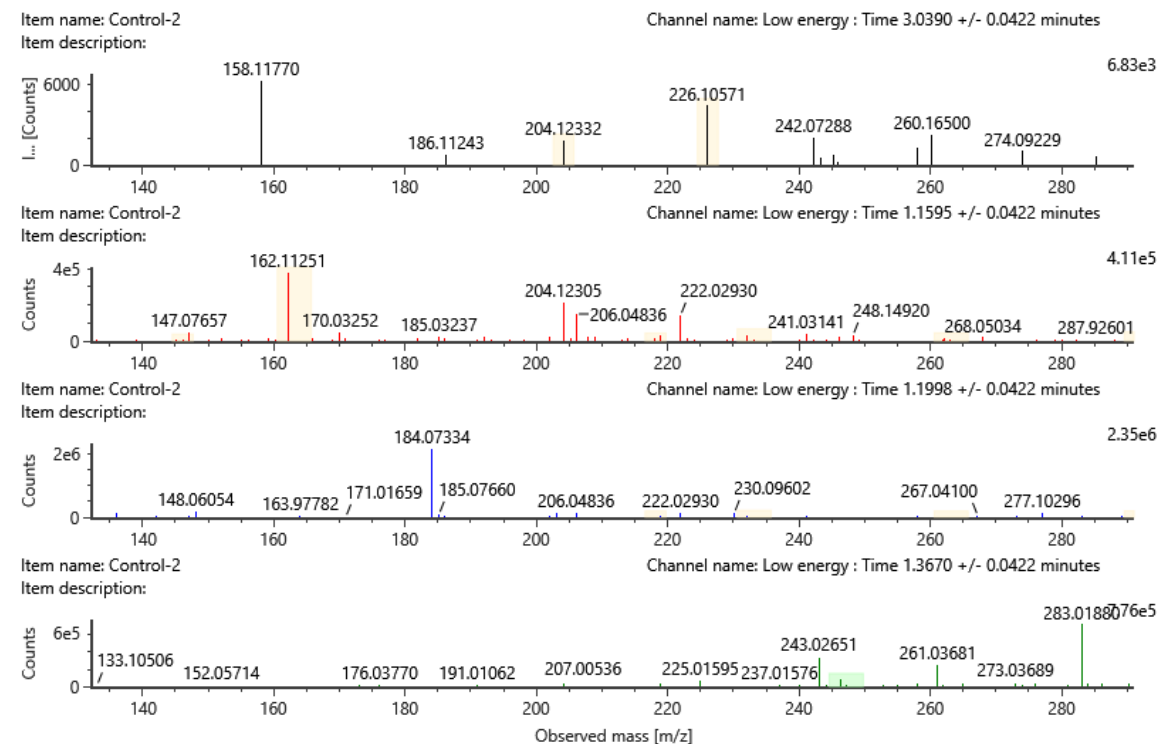

Figure S2. Representative (A) chromatogram and (B) mass spectrum for Figure 3A.

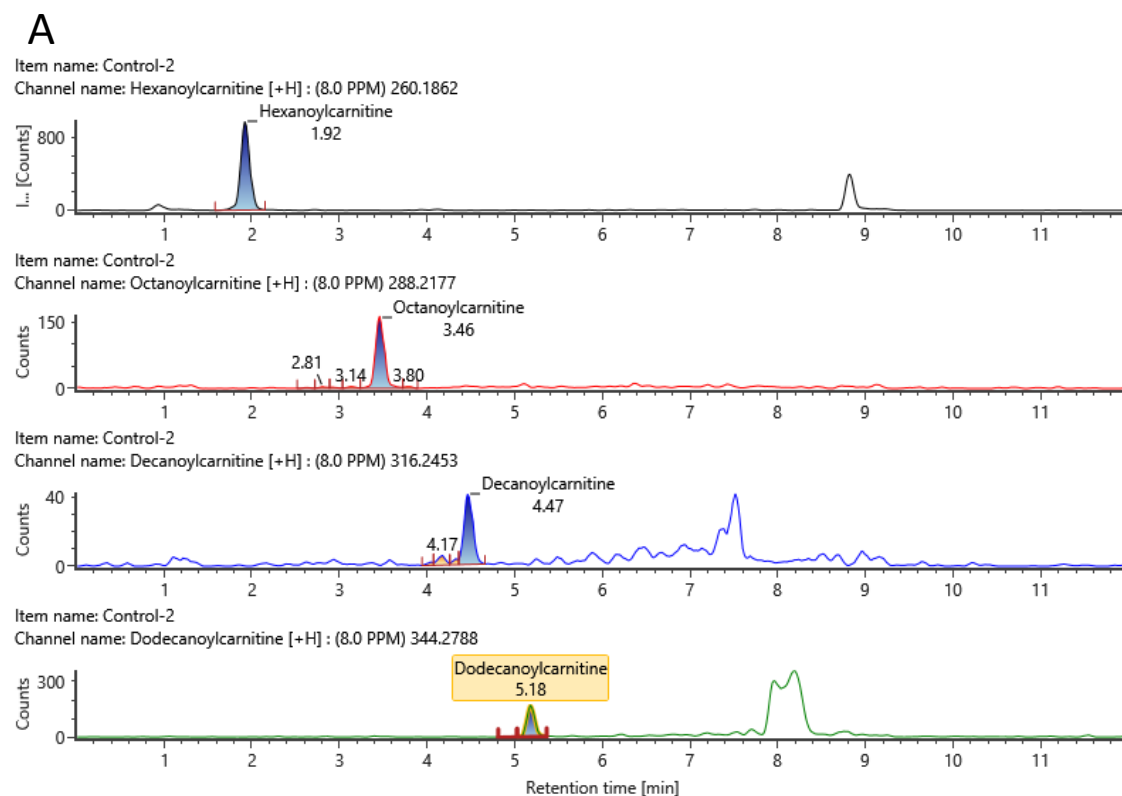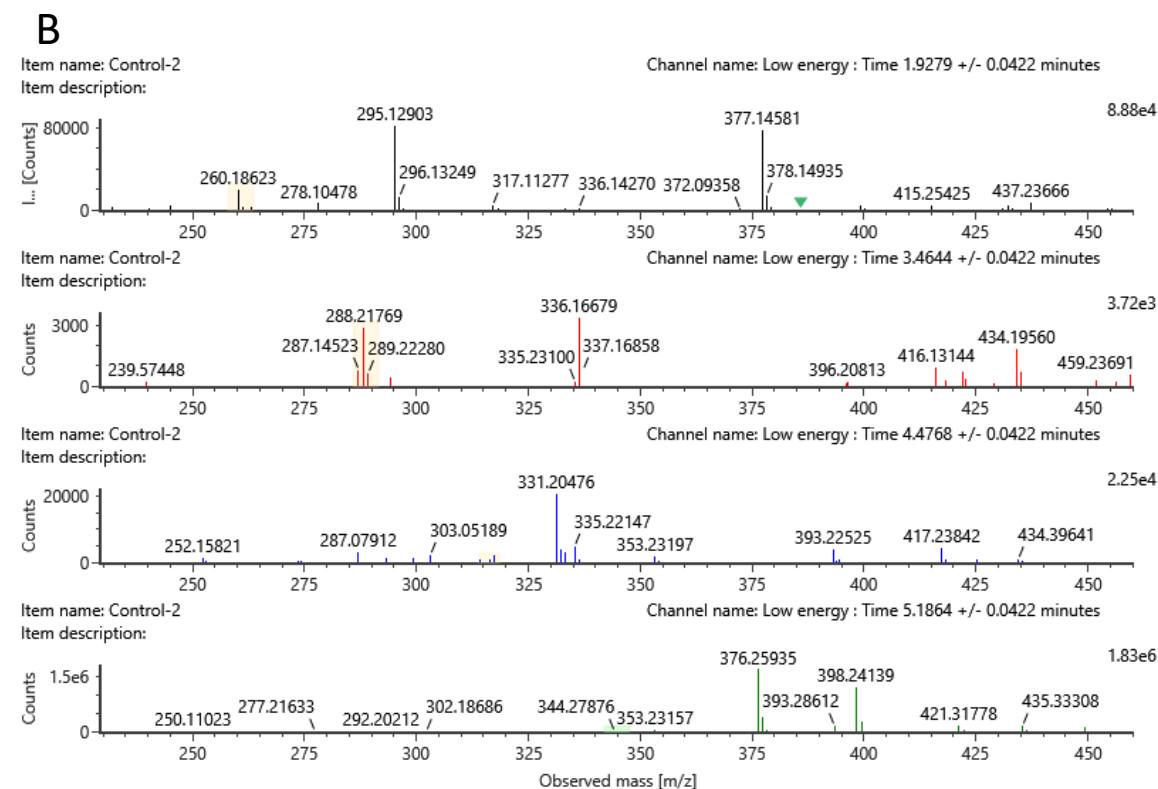

Figure S2. Representative (A) chromatogram and (B) mass spectrum for Figure 3A (continued).

C

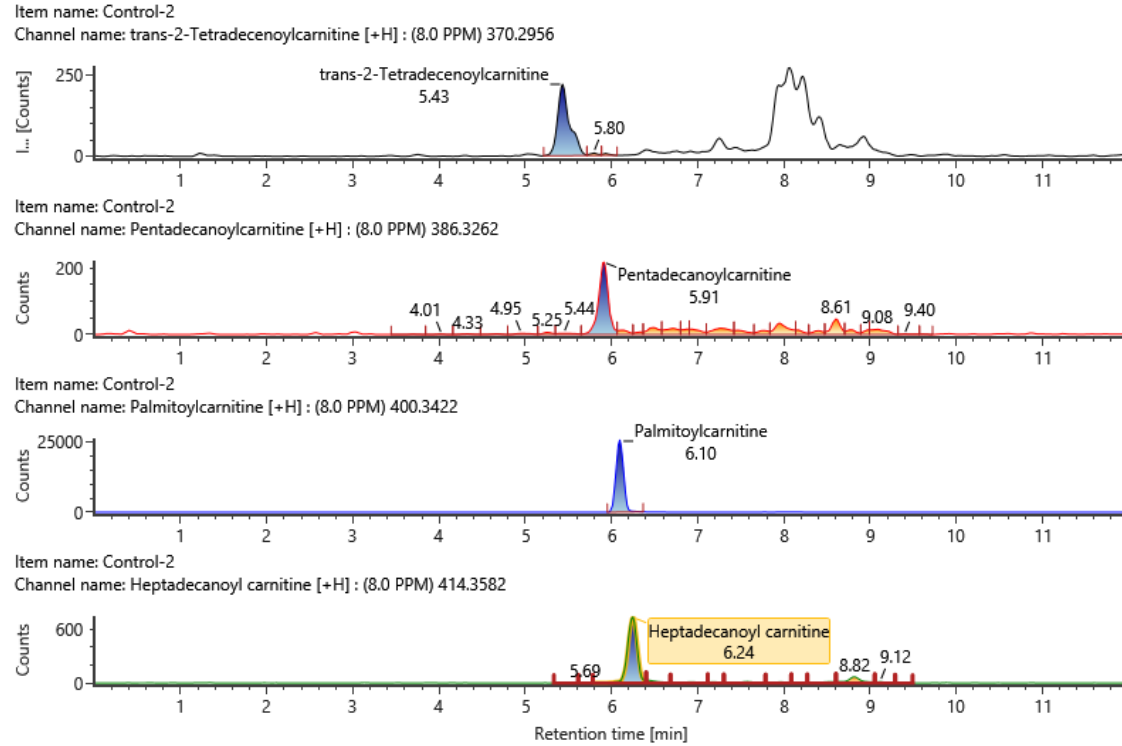

D

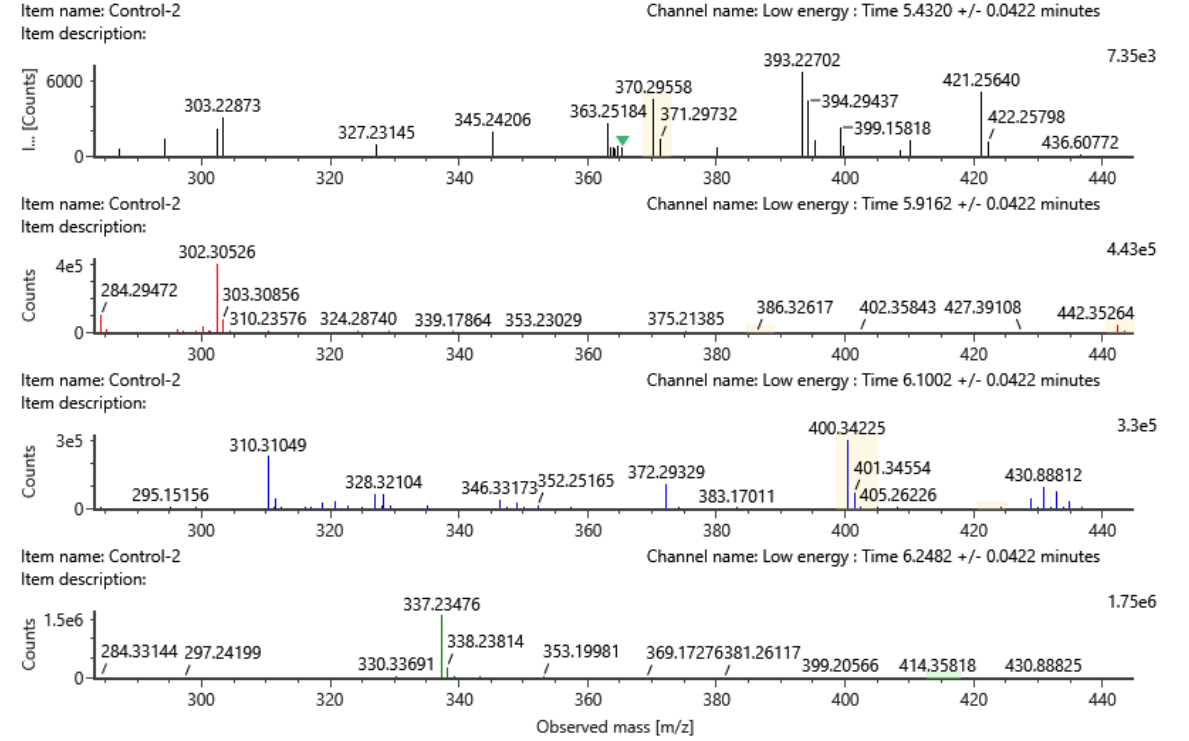

Figure S2. Representative (C) chromatogram and (D) mass spectrum for Figure 3B.

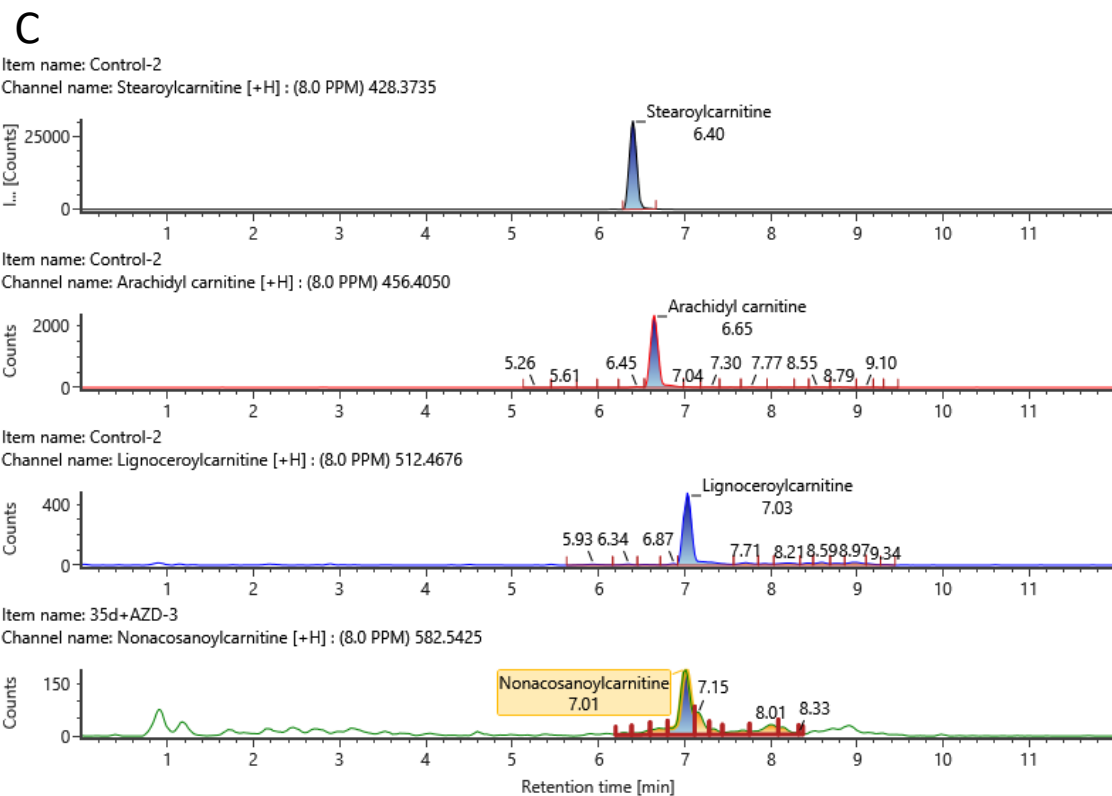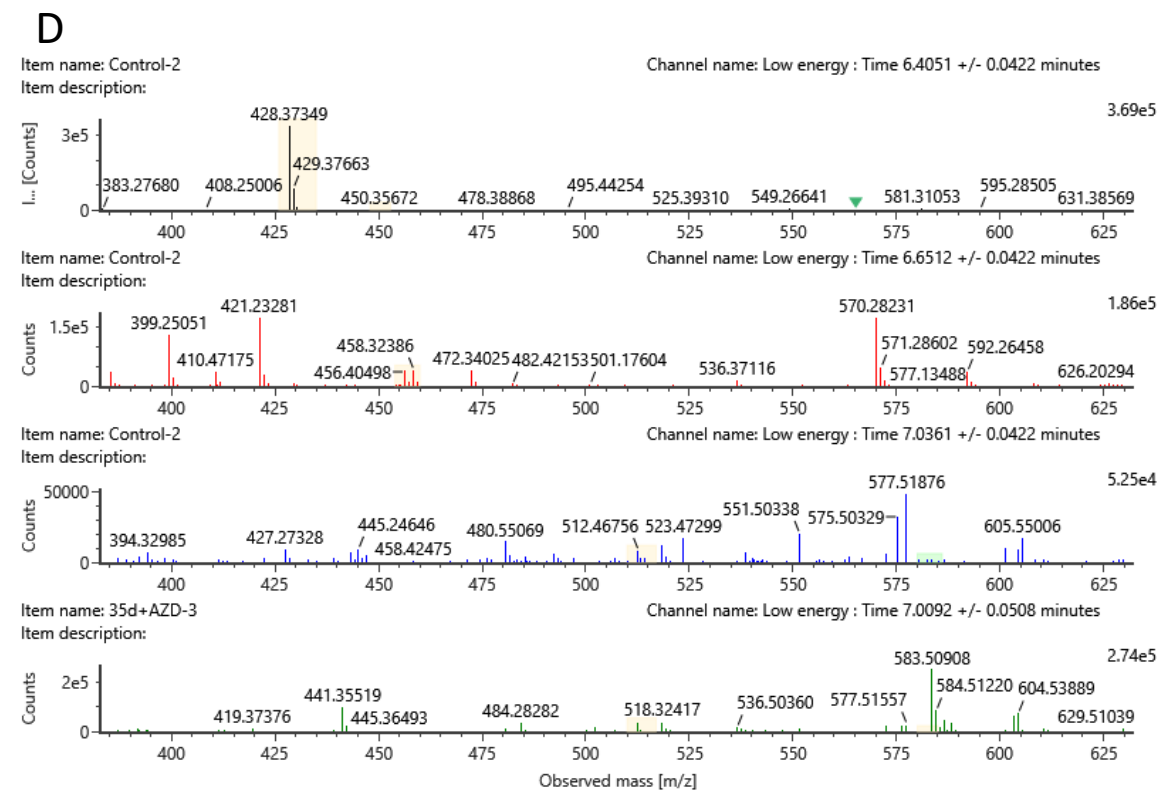

Figure S2. Representative (C) chromatogram and (D) mass spectrum for Figure 3B (continued).

E

Item name: Control-2  
Channel name: L-Carnitine [+H] : (8.0 PPM) 162.1125

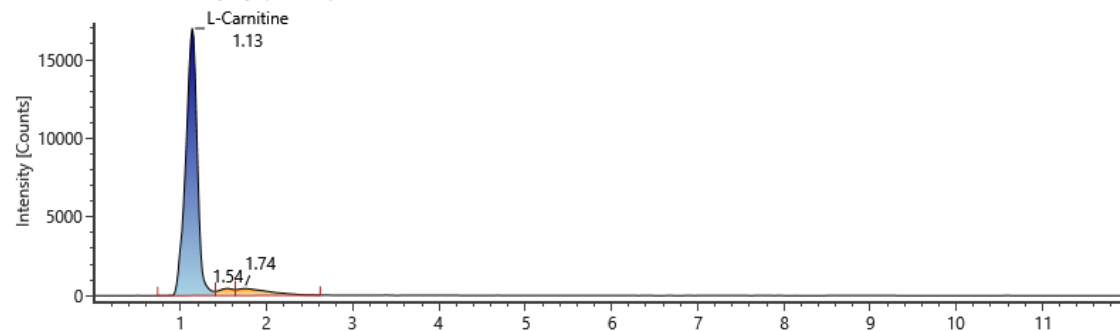

Item name: Control-2  
Channel name: 3-Dehydroxycarnitine [+H] : (8.0 PPM) 146.1179

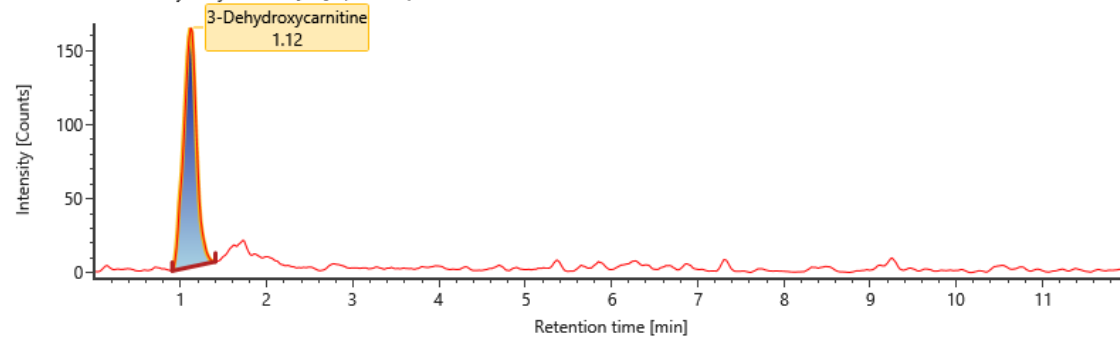

F

Item name: Control-2  
Item description:

Channel name: Low energy : Time 1.1400 +/- 0.0422 minutes

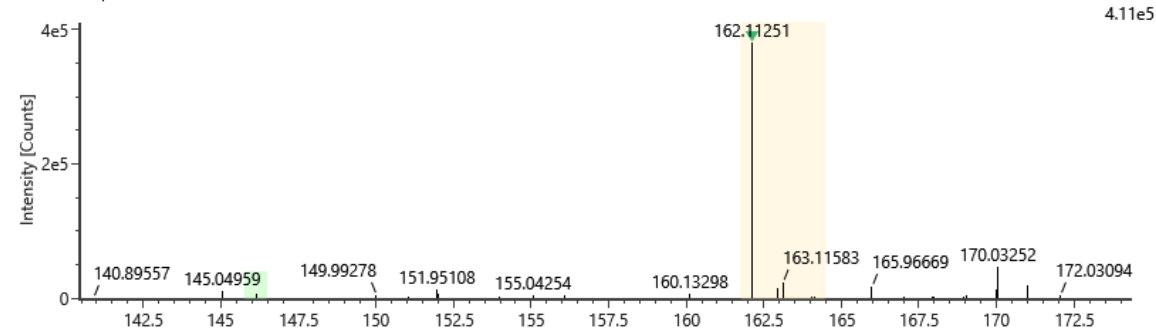

Item name: Control-2  
Item description:

Channel name: Low energy : Time 1.1247 +/- 0.0422 minutes

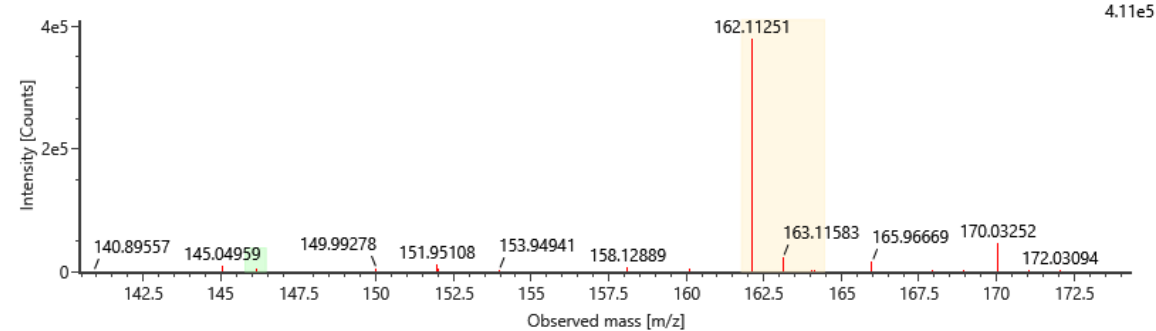

Figure S2. Representative (E) chromatogram and (F) mass spectrum for Figure 3C.

A

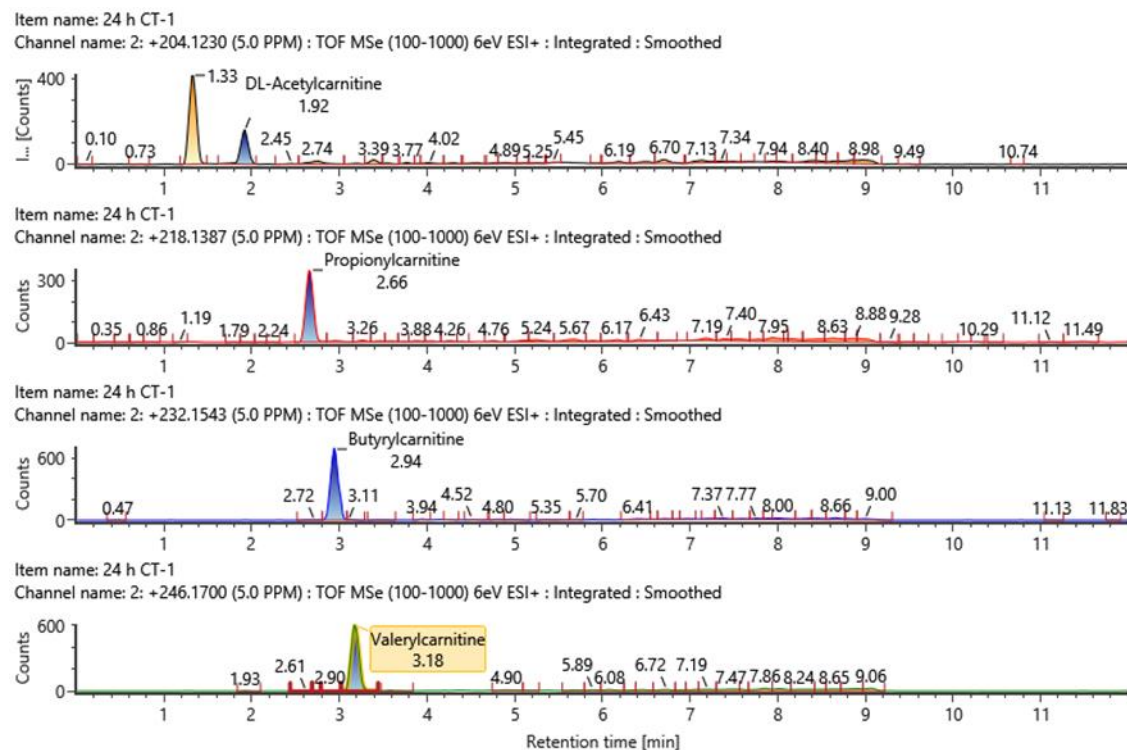

B

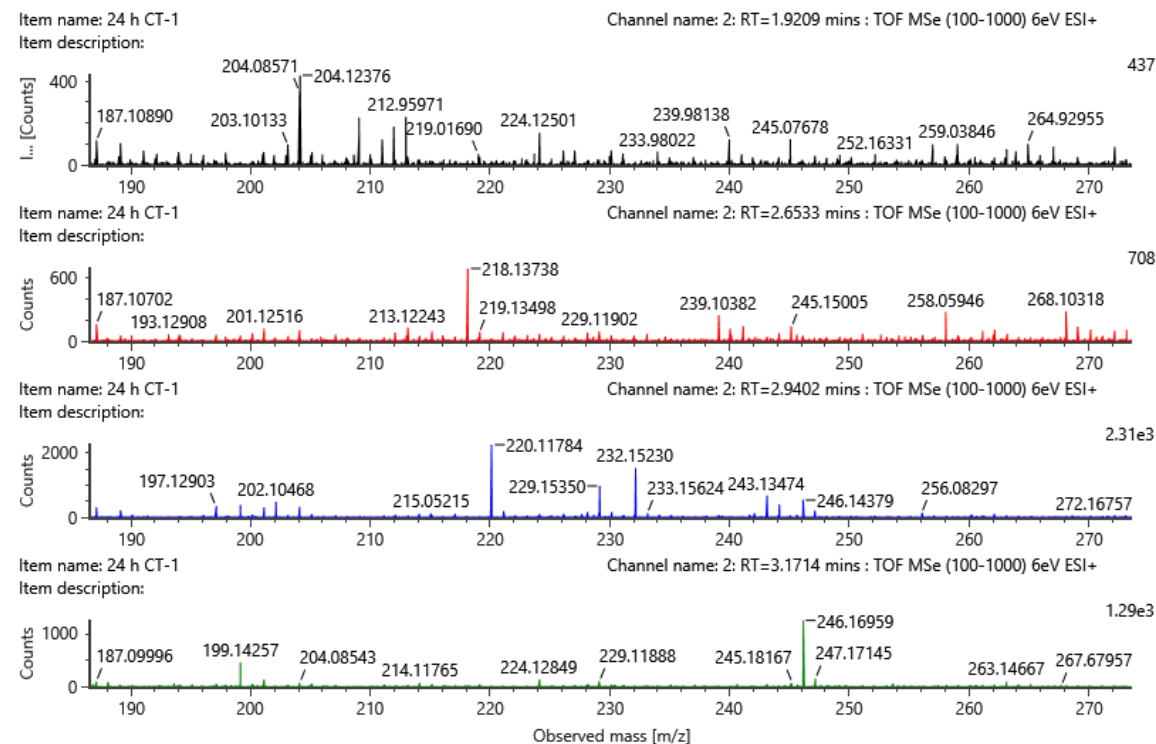

Figure S3. Representative (A) chromatogram and (B) mass spectrum for Figure 4A.



C

Item name: 24 h 35d+AZD-3

Channel name: 2: +400.3421 (5.0 PPM) : TOF MSe (100-1000) 6eV ESI+ : Integrated : Smoothed

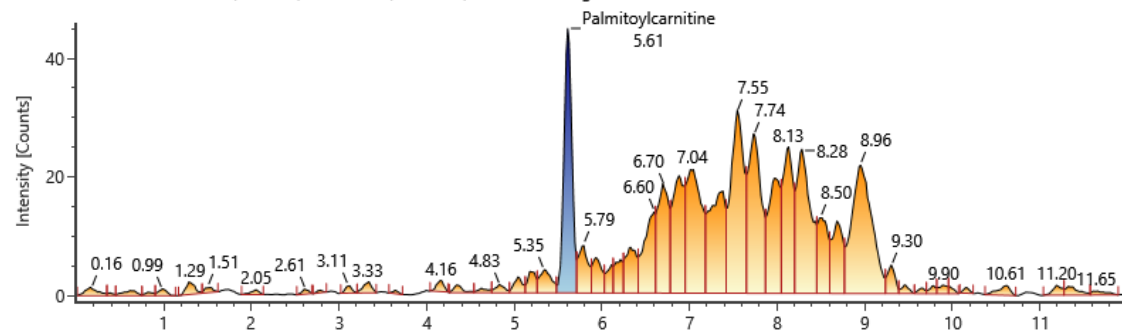

Item name: 24 h 35d+AZD-3

Channel name: 2: +428.3734 (5.0 PPM) : TOF MSe (100-1000) 6eV ESI+ : Integrated : Smoothed

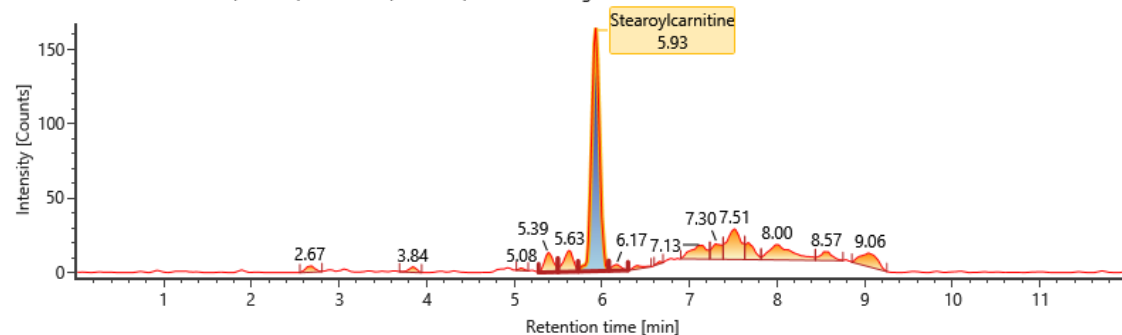

D

Item name: 24 h 35d+AZD-3

Item description:

Channel name: 2: RT=5.6107 mins : TOF MSe (100-1000) 6eV ESI+

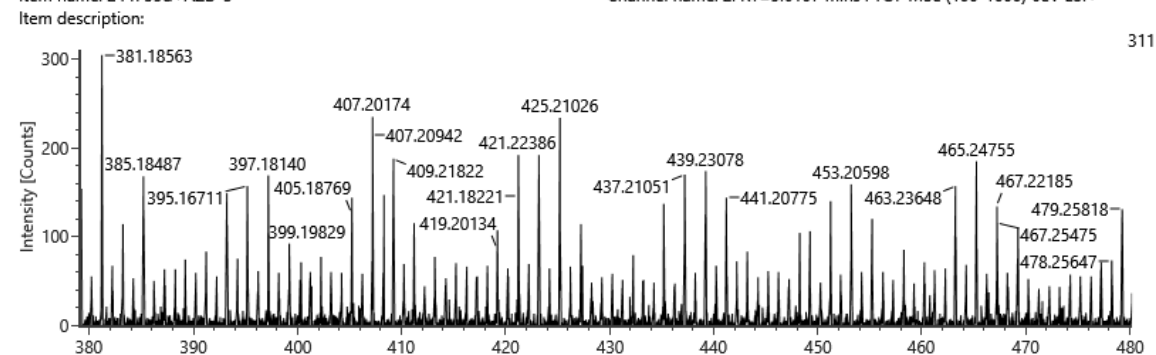

311

Item name: 24 h 35d+AZD-3

Item description:

Channel name: 2: RT=5.9314 mins : TOF MSe (100-1000) 6eV ESI+

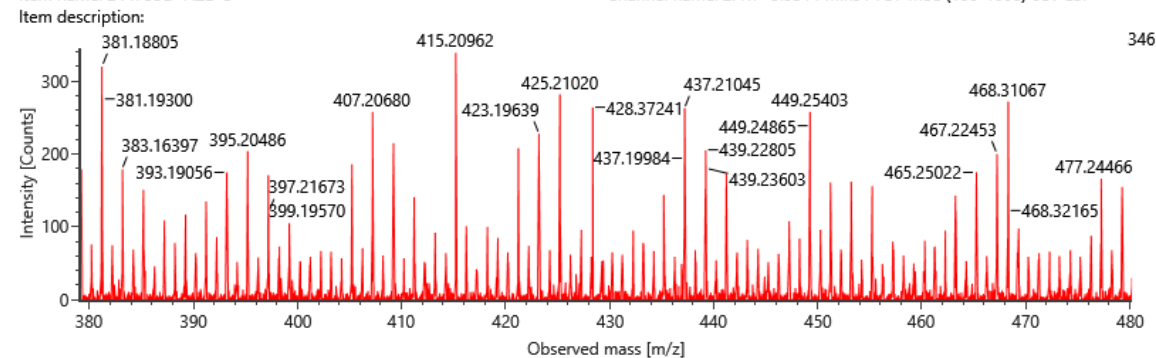

346

Figure S3. Representative (C) chromatogram and (D) mass spectrum for Figure 4B.

E

Item name: 24 h CT-2  
Channel name: 2: +162.1125 (5.0 PPM) : TOF MSe (100-1000) 6eV ESI+ : Integrated : Smoothed

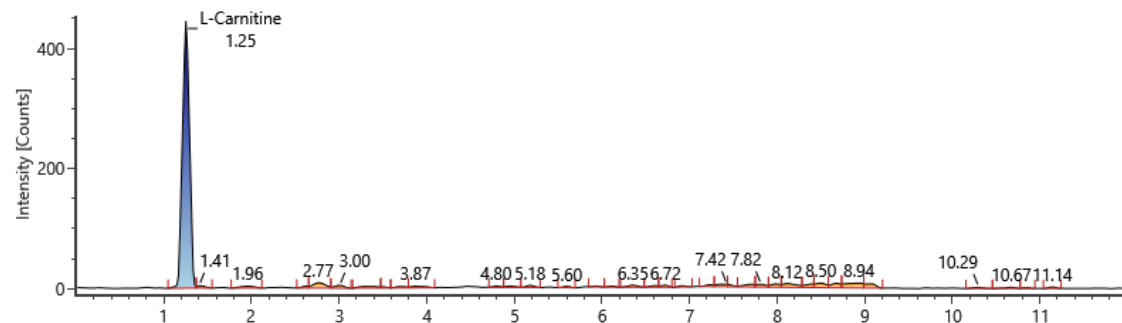

Item name: 24 h CT-2  
Channel name: 2: +146.1176 (5.0 PPM) : TOF MSe (100-1000) 6eV ESI+ : Integrated : Smoothed

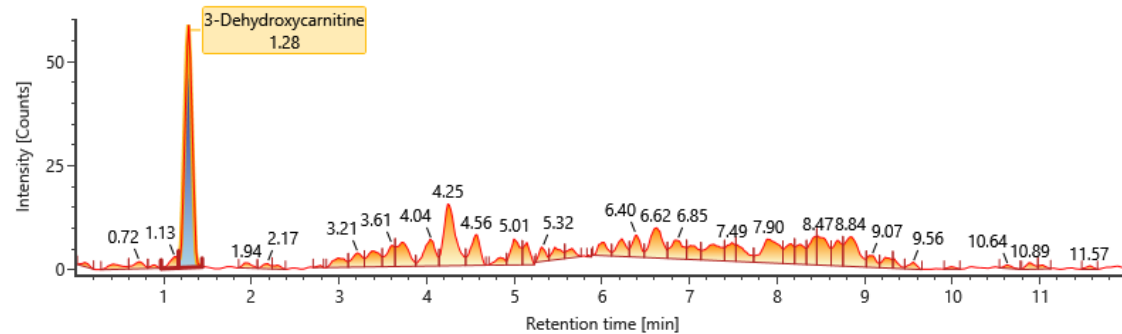

F

Item name: 24 h CT-2  
Item description:

Channel name: 2: RT=1.2508 mins : TOF MSe (100-1000) 6eV ESI+

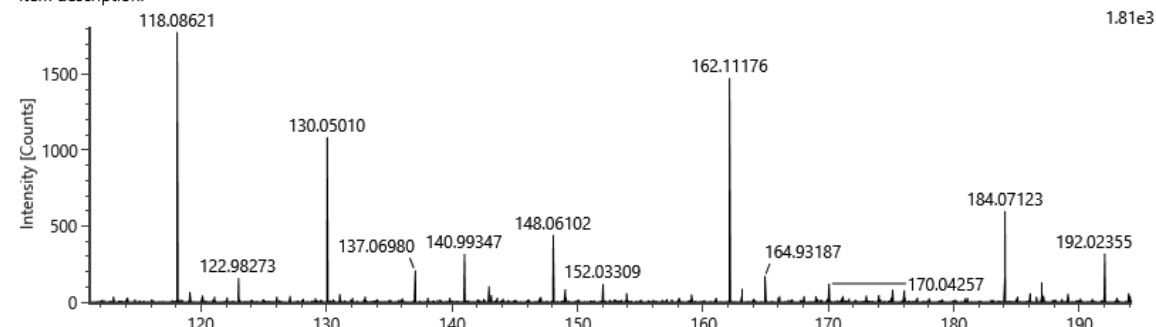

Item name: 24 h CT-2  
Item description:

Channel name: 2: RT=1.2846 mins : TOF MSe (100-1000) 6eV ESI+

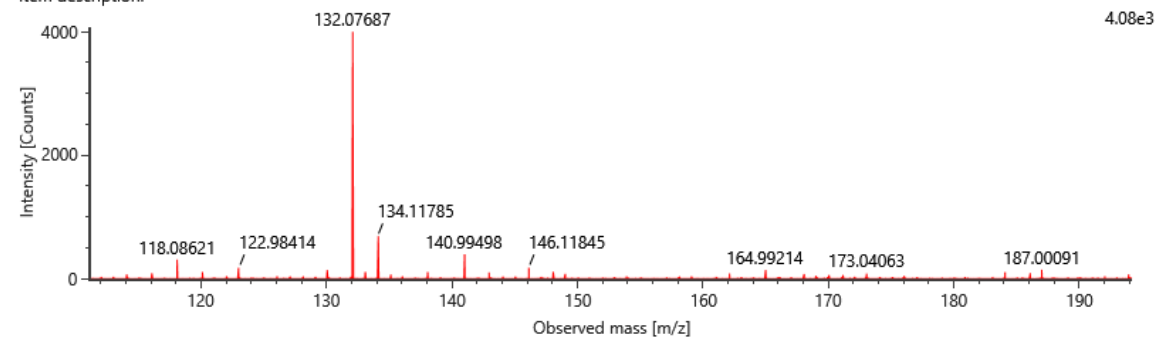

Figure S3. Representative (E) chromatogram and (F) mass spectrum for Figure 4C.
